# Supplementary material for: Un badge à l’école, la puce à l’oreille !
Source: MDPI journal article supplement (doi:10.3390/vaccines12030331), 2008-01-01
Supplement: s1 [file s1]

Supplementary material S2: draft for the interview conducted by the pharmacists

|                                                 |                                                                                                                                                                                                                                                              |
|-------------------------------------------------|--------------------------------------------------------------------------------------------------------------------------------------------------------------------------------------------------------------------------------------------------------------|
| Pharmacy name                                   |                                                                                                                                                                                                                                                              |
| Age                                             |                                                                                                                                                                                                                                                              |
| Gender                                          |                                                                                                                                                                                                                                                              |
| Vaccinated last year? (yes/no)                  |                                                                                                                                                                                                                                                              |
| If “no”, why?                                   | <input type="checkbox"/> not getting ill<br><input type="checkbox"/> vaccines are dangerous<br><input type="checkbox"/> did not know I could access flu vaccination<br><input type="checkbox"/> vaccines are not effective<br><input type="checkbox"/> other |
| Intention to get vaccinated this year (yes/no)? |                                                                                                                                                                                                                                                              |
| Presence of risk factors (specify which type)   |                                                                                                                                                                                                                                                              |
