# Supplementary material for: Un badge à l’école, la puce à l’oreille !
Source: MDPI journal article supplement (doi:10.3390/vaccines12030331), 2008-01-01
Supplement: s1 [file s1]

## Supplementary Material S1:

### Topics of the training course for pharmacists by the Department of Prevention

Title: "Safety and efficacy of vaccines: Influenza Vaccination Campaign 2019-2020"

#### Main topics:

- influenza surveillance in Italy
- influenza epidemiology in Italy and in Friuli Venezia Giulia
- virus typing during the 2017-2019 seasons in Italy
- impacts of influenza virus infection on cardiovascular disease and possible protective mechanism of vaccination
- influenza vaccination coverage among the elderly in Friuli Venezia Giulia 1997-2018
- influenza prevention and control: recommendations and targets for the 2019-2020 vaccination campaign
- ministerial guidelines for the definition of risk categories
- available vaccines types: appropriateness, efficacy and safety
- methods for distribution of the vaccine
- instructions for the promotion of influenza vaccination by Carnia district pharmacists
