# Supplementary material for: Un badge à l’école, la puce à l’oreille !
Source: MDPI journal article supplement (doi:10.3390/vaccines12030331), 2008-01-01
Supplement: s1 [file s1]

Supplementary material S3: comparison among different settings

|                                                                 | Carnia district                            | Gemona district                                     | LHA | Udine province |
|-----------------------------------------------------------------|--------------------------------------------|-----------------------------------------------------|-----|----------------|
| Informative advertising campaign                                | ✓                                          | ✓                                                   | ✓   | ✓              |
| Vaccinations' delivery performed by GPs                         | ✓                                          | ✓                                                   | ✓   | ✓              |
| Vaccines' distribution                                          | by local pharmacies<br>in several tranches | by the Department of Prevention in a unique tranche |     |                |
| Training course for pharmacists by the Department of Prevention | ✓                                          | x                                                   | x   | x              |
| Pharmacists' one-to-one counseling                              | ✓                                          | x                                                   | x   | x              |
